# Supplementary figures and images for: A simple method to alter the binding specificity of DNA-coated colloids that crystallize
Source: Royal Society of Chemistry journal article supplement (doi:10.1039/d3sm01105d), 2023-01-01

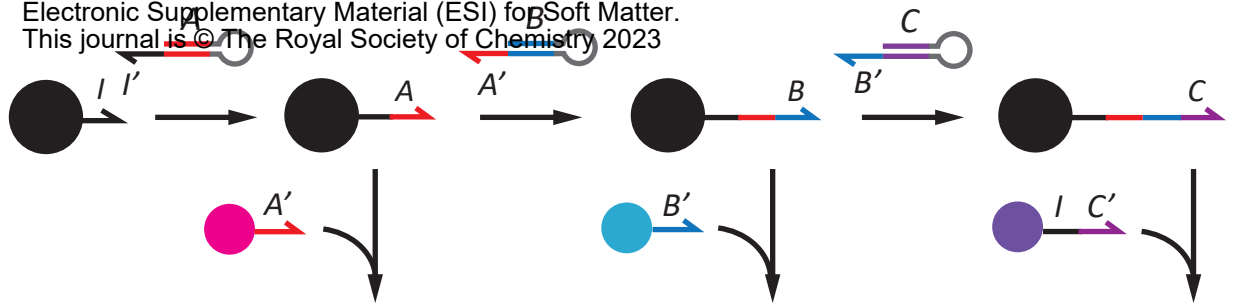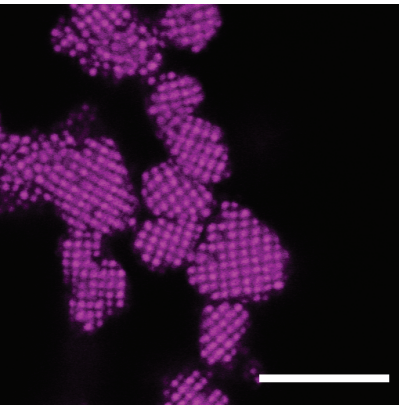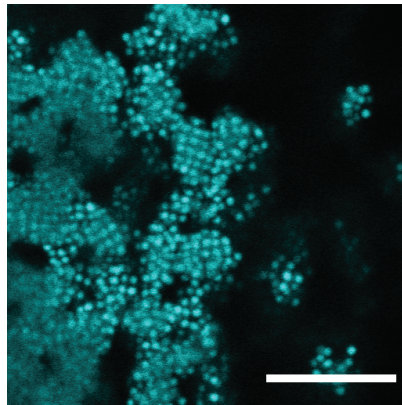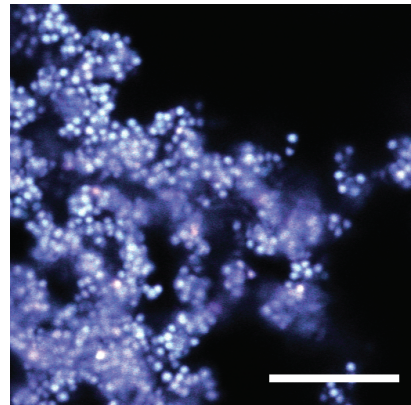

Supplement: d3sm01105d2.pdf [file d3sm01105d2.pdf]
